# Supplementary material
Source: HighWire-hosted journal article supplement (https://bmjopen.bmj.com/content/15/2/e088691)
Supplement: inline-supplementary-material-1 [file inline-supplementary-material-1.pdf]

*Supplementary table 1 The “chapters” and their International statistical Classification of Diseases and related health problems 10th edition (ICD-10) used to classify the primary diagnosis for each of the admissions that occurred in the year preceding an ischaemic heart disease death.*

| Chapter                                  | ICD code range      |
|------------------------------------------|---------------------|
| Infection                                | A00-B99             |
| Neoplasms                                | C00-C96, D00-D49    |
| Haematological                           | D50-D89             |
| Endocrine                                | E00-E99             |
| Mental and behavioural disorders         | F01-F99             |
| Nervous system                           | G00-G99             |
| Eyes, ears, nose and neck                | H00-H99             |
| Circulatory diseases                     | I00-I99, R074, R073 |
| Digestive system                         | K00-K00             |
| Skin and subcutaneous tissue             | L00-L99             |
| Musculoskeletal and rheumatological      | M00-M99             |
| Genitourinary system                     | N00-N99             |
| Pregnancy, childbirth and the puerperium | O00-O99             |
| Injury                                   | S00-Y99             |
| Respiratory system                       | J00-J99             |
| Other                                    |                     |

| WHO <sup>†</sup> Diagnosis Chapters      | U1   |         | U2   |         | Rural |         |
|------------------------------------------|------|---------|------|---------|-------|---------|
| Infection                                | 174  | (1.3%)  | 71   | (1.1%)  | 63    | (1.2%)  |
| Neoplasms                                | 788  | (5.9%)  | 426  | (6.9%)  | 350   | (6.4%)  |
| Haematological                           | 147  | (1.1%)  | 59   | (1.0%)  | 62    | (1.1%)  |
| Endocrine                                | 513  | (3.8%)  | 174  | (2.8%)  | 190   | (3.5%)  |
| Mental and behavioral disorders          | 144  | (1.1%)  | 70   | (1.1%)  | 41    | (0.8%)  |
| Nervous system                           | 346  | (2.6%)  | 170  | (2.7%)  | 145   | (2.7%)  |
| Eyes, ears, nose and neck                | 806  | (6.0%)  | 446  | (7.2%)  | 310   | (5.7%)  |
| Circulatory diseases                     | 4324 | (32.2%) | 2035 | (32.8%) | 1789  | (32.9%) |
| Respiratory system                       | 820  | (6.1%)  | 391  | (6.3%)  | 337   | (6.2%)  |
| Digestive system                         | 1147 | (8.5%)  | 487  | (7.9%)  | 460   | (8.5%)  |
| Skin and subcutaneous tissue             | 304  | (2.3%)  | 197  | (3.2%)  | 122   | (2.2%)  |
| Musculoskeletal and rheumatological      | 911  | (6.8%)  | 433  | (7.0%)  | 432   | (7.9%)  |
| Genitourinary system                     | 468  | (3.5%)  | 245  | (4.0%)  | 160   | (2.9%)  |
| Pregnancy, childbirth and the puerperium | 15   | (0.1%)  | 6    | (0.1%)  | 1     | (0.0%)  |
| Injury                                   | 1251 | (9.3%)  | 475  | (7.7%)  | 420   | (7.7%)  |
| Other                                    | 1285 | (9.6%)  | 516  | (8.3%)  | 554   | (10.2%) |

† World Health Organisation

*Supplementary table 2: The reason for admission in the year before Ischaemic Heart Disease death grouped into the World Health Organisation’s International Classification for Diseases 10th edition chapters and categorised by Geographic Classification of Health category. Column totals and percentages.*
